# Supplementary material
Source: publisher site journal article supplement (https://www.spandidos-publications.com/1369/downloadSupplementary)

Figure S1. Expression levels of miR-96 and CAV-1 in cervical cancer cell lines. (A) Expression level of miR-96 in SiHa, C33A and CaSki cells. (B) Expression level of CAV-1 mRNA in SiHa and C33A cells transfected with pcDNA3.1-CAV-1 vector. (C) Protein expression level of CAV-1 in SiHa and C33A cells transfected with pcDNA3.1-CAV-1 vector. \* $P < 0.05$ . Data are presented as the mean  $\pm$  SD. miR-96, microRNA-96; CAV-1, caveolin 1; CAV-1-OE, cells transfected with pcDNA3.1-CAV-1 overexpression vector; NC, negative control.

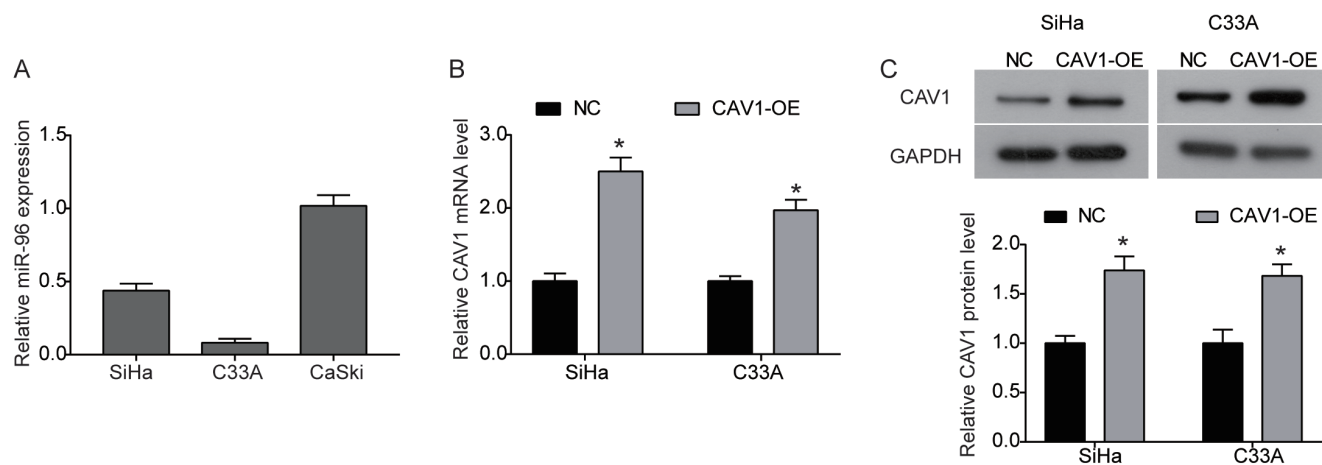

Supplement: Supplementary file 1 [file downloadSupplementary]
